# Supplementary material for: Association of Left Atrial Size Measured by Non-Contrast Computed Tomography with Cardiovascular Risk Factors—The Danish Cardiovascular Screening Trial (DANCAVAS)
Source: MDPI journal article supplement (doi:10.3390/diagnostics12020244), 2022-01-19
Supplement: s1 [file s1]

**Table S1.** Linear regression of left atrium area index (cm<sup>2</sup>/m<sup>2</sup>) in men, analyzed in three subgroups depending on heart rate.

| Variable                     | Heart Rate < 65<br><i>n</i> = 4574 |                | Heart Rate 65–75<br><i>n</i> = 3017 |                | Heart Rate ≥ 75<br><i>n</i> = 3133 |                |
|------------------------------|------------------------------------|----------------|-------------------------------------|----------------|------------------------------------|----------------|
|                              | Δ LA area index<br>(95% CI)        | <i>p</i> Value | Δ LA Area Index<br>(95% CI)         | <i>p</i> Value | Δ LA Area Index<br>(95% CI)        | <i>p</i> Value |
| Age (years) *                | 0.05 (0.03;0.07)                   | <0.001         | 0.06 (0.04;0.09)                    | <0.001         | 0.06 (0.03;0.08)                   | <0.001         |
| Smoking                      |                                    |                |                                     |                |                                    |                |
| Former                       | −0.34 (−0.47; −0.21)               | <0.001         | −0.44 (−0.61; −0.27)                | <0.001         | −0.53 (−0.74; −0.33)               | <0.001         |
| Current                      | −0.93 (−1.13; −0.74)               | <0.001         | −0.83 (−1.06; −0.60)                | <0.001         | −1.29 (−1.54; −1.04)               | <0.001         |
| Pulse pressure (mmHg) *      | 0.03 (0.02; 0.03)                  | <0.001         | 0.02 (0.02; 0.03)                   | <0.001         | 0.03 (0.02; 0.03)                  | <0.001         |
| HbA1c (mmol/mol) *           | −0.02 (−0.03; −0.01)               | <0.001         | −0.02 (−0.03; −0.01)                | 0.003          | −0.01 (−0.02; 0.00)                | 0.100          |
| Total cholesterol (mmol/L) * | −0.09 (−0.15; −0.03)               | 0.004          | −0.09 (−0.17; −0.13)                | 0.022          | −0.14 (−0.23; −0.06)               | 0.001          |

\* By 1 unit increment.
